# Supplementary material
Source: PubMed Central journal article supplement (PMC2587594)
Supplement: 0805993105_0805993105SI.pdf [file 0805993105_0805993105SI.pdf]

# Supporting Information

González *et al.* 10.1073/pnas.0805993105

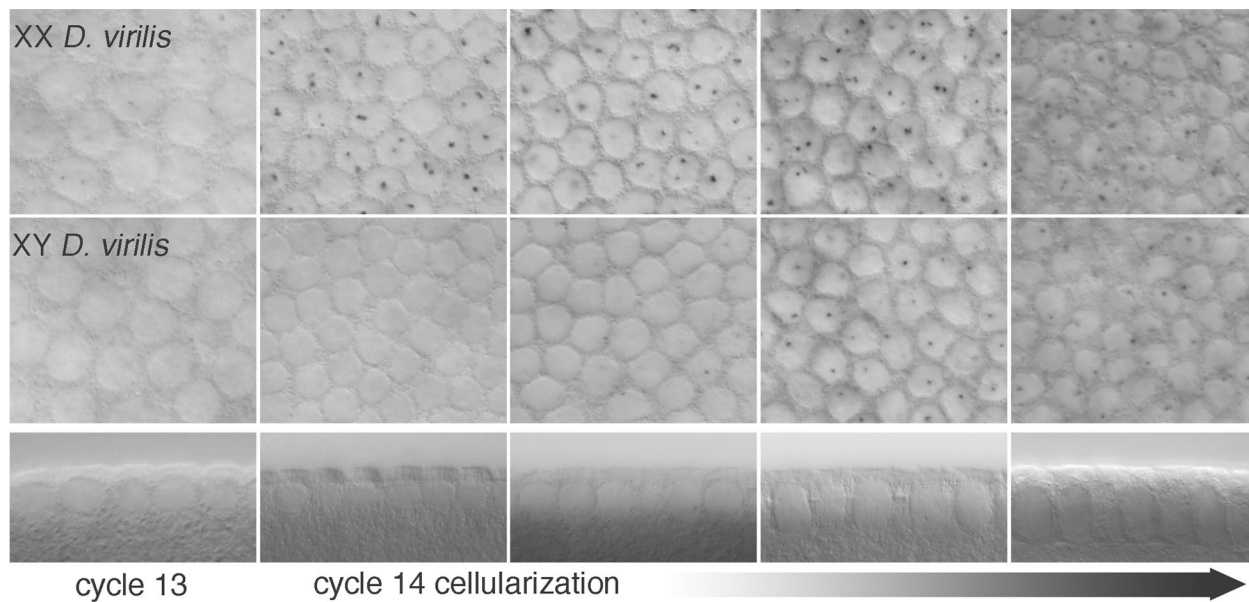

**Fig. S1.** Time course of nascent *SxlPm* transcripts in *D. virilis* determined by in situ hybridizations with a probe specific for *D. virilis SxlPm*-derived premRNA. (Top) Surface views of syncytial nuclei in wild-type XX and XY embryos during cycles 13 and 14. (Bottom) Views of elongating nuclei of the XY embryos pictured above to monitor progression through the cellularization cycle. Nascent transcripts from sister chromatids can be seen in some nuclei (15, 22).

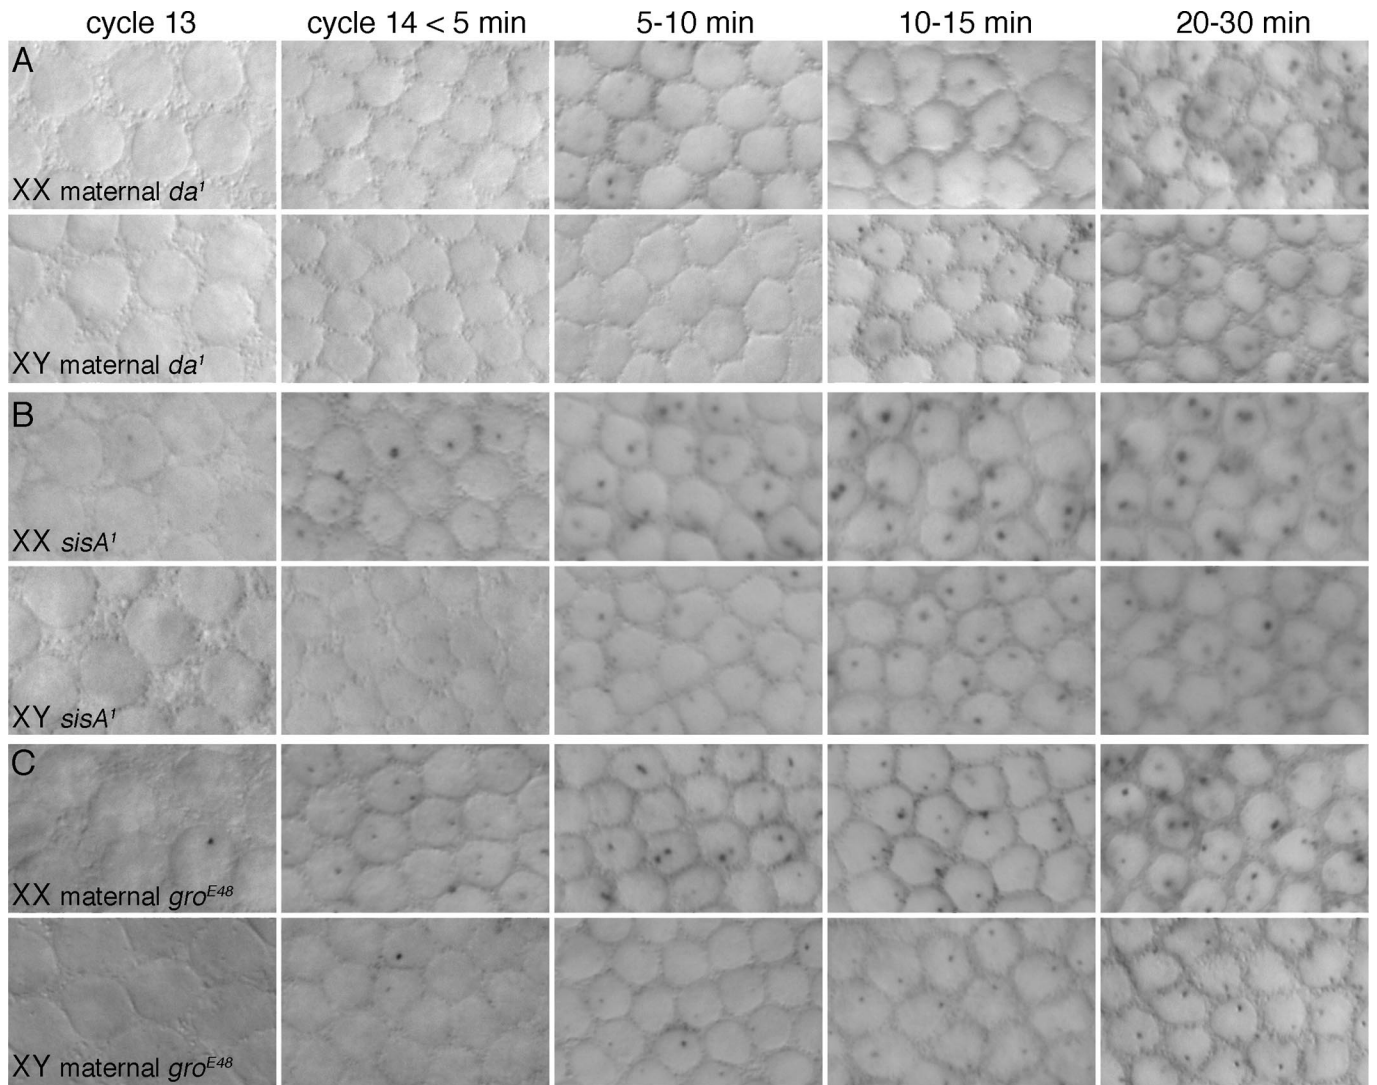

**Fig. S2.** Time course of nascent *SxlPm* transcripts in maternal or zygotic sex signal mutants. (A) Progeny of homozygous *da*<sup>1</sup> mothers. (B) *sisA*<sup>1</sup> mutant embryos from crosses of *y pn cm Sxl<sup>M4</sup> v sisA<sup>1</sup>/y pn cm Sxl<sup>I1</sup> ct<sup>6</sup> v sisA<sup>1</sup>* females and *y pn cm Sxl<sup>I1</sup> ct<sup>6</sup> v sisA<sup>1</sup>/Y* males. (C) Progeny of mothers carrying *gro*<sup>E48</sup> germline clones.



**Table S1. Percentage of nuclei expressing *SxIPm* at indicated cell cycle times**

| Genotype                                   |    | Percentage of nuclei expressing <i>SxIPm</i> , range (number of embryos counted) |                   |                    |                     |                     |
|--------------------------------------------|----|----------------------------------------------------------------------------------|-------------------|--------------------|---------------------|---------------------|
|                                            |    | Cycle 13                                                                         | Cycle 14, < 5 min | Cycle 14, 5–10 min | Cycle 14, 10–15 min | Cycle 14, 15–20 min |
| wt                                         | XX | 12–16 (4)                                                                        | 48–61 (5)         | 85–91 (5)          | 100                 | 100                 |
|                                            | XY | 0 (10)                                                                           | 6–9 (5)           | 33–39 (3)          | 71–85 (3)           | 100                 |
| <i>sc<sup>sisB3</sup></i>                  | XX | 0 (2)                                                                            | 12–16 (3)         | 51–63 (2)          | 80–90 (2)           | 100                 |
|                                            | XY | 0 (3)                                                                            | 0 (2)             | 7–9 (2)            | 53 (1)              | 77–79 (2)           |
| <i>da<sup>1</sup></i>                      | XX | 0 (8)                                                                            | 7–13 (3)          | 50–57 (3)          | 83 (2)              | 100                 |
|                                            | XY | 0 (3)                                                                            | 0 (5)             | 8–9 (2)            | 54–60 (2)           | 76–88 (2)           |
| <i>Dp sc<sup>+</sup>, sisA<sup>+</sup></i> | XX | 71 (1)                                                                           | 89–90 (2)         | 100                | 100                 | 100                 |
|                                            | XY | 27 (1)                                                                           | 74 (1)            | 81 (1)             | 100                 | 100                 |
| <i>sisA<sup>1</sup></i>                    | XX | 11–13 (2)                                                                        | 45–55 (3)         | 83–88 (2)          | 100                 | 100                 |
|                                            | XY | 0 (2)                                                                            | 9–11 (3)          | 21–35 (2)          | 82–85 (2)           | 100                 |
| <i>gro<sup>E48</sup></i>                   | XX | 11–16 (2)                                                                        | 46–57 (2)         | 81–85 (2)          | 100                 | 100                 |
|                                            | XY | 0 (3)                                                                            | 10 (2)            | 30–32 (2)          | 79–85 (2)           | 100                 |

The percentage of expressing nuclei was determined by counting all nuclei in photographs of embryos. Mean number of cycle 13 nuclei counted/embryo ( $\pm$  standard error) = 224 ( $\pm$  26); mean number of cycle 14 nuclei counted/embryo = 432 ( $\pm$  38). For samples listed as 0% expressing, the number in parentheses indicates photographs examined for evidence of expression. At least 10 additional fixed embryos were examined directly for expressing nuclei for all nonexpressing stages. For those listed as 100% expressing, at least one photograph and several other embryos were examined thoroughly for rare nonexpressing nuclei.
